# Supplementary material
Source: PubMed Central journal article supplement (PMC6077105)
Supplement: NIHMS944442-supplement-1.pdf [file NIHMS944442-supplement-1.pdf]

# Pluripotent stem cells as a source of osteoblasts for tissue regeneration

Hui Zhu<sup>1</sup>, Takaharu Kimura<sup>1</sup>, Srilatha Swami<sup>1</sup>, Joy Wu<sup>1\*</sup>

## Supplementary information

### Supplementary figure legends

**Fig. S1. qRT-PCR validation of osteoblast and bone related gene upregulation and Gene Ontology Analysis of significantly downregulated genes in ESC-OB versus ESC.** (A) qRT-PCR analysis of osteoblast and bone related genes on ESC-OB and ESC normalized to  $\beta$ -actin. \*,  $p < .05$ ; \*\*,  $p < .005$ ; #,  $p < 5 \times 10^{-4}$  (relative to ESC). (B) Gene Ontology Analysis of biological process for significantly downregulated genes in mouse ESC-OB versus ESC population. Gene fold enrichment and  $-\log_{10}$  (P value) of top 20 annotation terms were shown.

**Fig. S2. qRT-PCR validation of osteoblast and bone related gene upregulation and Gene Ontology Analysis of significantly downregulated genes in iPSC-OB versus iPSC.** (A) qRT-PCR analysis of osteoblast and bone related genes on iPSC-OB and iPSC normalized to  $\beta$ -actin. \*\*,  $p < .005$ ; #,  $p < 5 \times 10^{-4}$ ; +,  $p < 5 \times 10^{-5}$  (relative to iPSC). (B) Gene Ontology Analysis of biological process for significantly downregulated genes in mouse iPSC-OB versus iPSC population. Gene fold enrichment and  $-\log_{10}$  (P value) of top 20 annotation terms were shown.

**Fig. S3. Gene Ontology Analysis of significantly downregulated genes in ESC-OB GFP<sup>+</sup> versus ESC.** Gene Ontology Analysis of biological process for significantly downregulated genes in mouse ESC-OB GFP<sup>+</sup> versus ESC population. Gene fold enrichment and  $-\log_{10}$  (P value) of top 20 annotation terms were shown.

### Supplementary Table information

Table S1. ESC-OB vs ESC significantly upregulated genes Signaling Pathway Analysis (Top 50 Terms)

| Signaling Pathway                                      | Gene Number | P value   |
|--------------------------------------------------------|-------------|-----------|
| Focal adhesion                                         | 135         | -1.44E-25 |
| ECM-receptor interaction                               | 72          | -2.55E-23 |
| Pathways in cancer                                     | 178         | -1.81E-18 |
| Dilated cardiomyopathy                                 | 65          | -1.54E-15 |
| Axon guidance                                          | 84          | -2.50E-14 |
| Hypertrophic cardiomyopathy (HCM)                      | 60          | -4.19E-14 |
| Lysosome                                               | 79          | -6.79E-14 |
| MAPK signaling pathway                                 | 138         | -7.77E-12 |
| Endocytosis                                            | 117         | -3.04E-11 |
| Amoebiasis                                             | 71          | -6.49E-11 |
| Regulation of actin cytoskeleton                       | 113         | -2.54E-10 |
| Osteoclast differentiation                             | 70          | -6.47E-10 |
| Arrhythmogenic right ventricular cardiomyopathy (ARVC) | 49          | -1.31E-09 |
| Vascular smooth muscle contraction                     | 71          | -2.60E-09 |
| Chagas disease (American trypanosomiasis)              | 60          | -5.95E-09 |
| Small cell lung cancer                                 | 52          | -4.29E-08 |
| Cytokine-cytokine receptor interaction                 | 118         | -5.71E-08 |
| TGF-beta signaling pathway                             | 51          | -8.28E-08 |
| Toxoplasmosis                                          | 69          | -1.23E-07 |
| Apoptosis                                              | 51          | -1.41E-07 |
| Protein processing in endoplasmic reticulum            | 86          | -1.87E-07 |
| Leukocyte transendothelial migration                   | 65          | -3.31E-07 |
| Gastric acid secretion                                 | 44          | -5.36E-07 |

|                                           |    |           |
|-------------------------------------------|----|-----------|
| Calcium signaling pathway                 | 88 | -6.99E-07 |
| Tight junction                            | 70 | -1.06E-06 |
| Pancreatic cancer                         | 42 | -1.15E-06 |
| Salivary secretion                        | 45 | -1.36E-06 |
| Melanogenesis                             | 55 | -1.40E-06 |
| SNARE interactions in vesicular transport | 25 | -1.86E-06 |
| Hepatitis C                               | 70 | -2.14E-06 |
| Chronic myeloid leukemia                  | 42 | -5.32E-06 |
| Wnt signaling pathway                     | 75 | -6.88E-06 |
| Hedgehog signaling pathway                | 33 | -9.33E-06 |
| Adipocytokine signaling pathway           | 39 | -1.27E-05 |
| Toll-like receptor signaling pathway      | 53 | -1.37E-05 |
| Aldosterone-regulated sodium reabsorption | 28 | -1.50E-05 |
| PPAR signaling pathway                    | 44 | -1.57E-05 |
| Circadian rhythm                          | 17 | -1.63E-05 |
| Complement and coagulation cascades       | 42 | -2.09E-05 |
| Neurotrophin signaling pathway            | 64 | -3.66E-05 |
| Chemokine signaling pathway               | 85 | -3.99E-05 |
| Renal cell carcinoma                      | 39 | -4.92E-05 |
| Jak-STAT signaling pathway                | 71 | -0.000115 |
| NOD-like receptor signaling pathway       | 32 | -0.000133 |
| Adherens junction                         | 39 | -0.000163 |
| Drug metabolism - cytochrome P450         | 44 | -0.000221 |
| ErbB signaling pathway                    | 44 | -0.000221 |
| Protein digestion and absorption          | 40 | -0.00029  |
| Phosphatidylinositol signaling system     | 40 | -0.00029  |
| Bacterial invasion of epithelial cells    | 37 | -0.000321 |

Table S2. iPSC-OB vs iPSC significantly upregulated genes Signaling Pathway Analysis (Top 50 Terms)

| Signaling Pathway | Gene Number | P value   |
|-------------------|-------------|-----------|
| Lysosome          | 70          | -7.25E-18 |
| Focal adhesion    | 97          | -2.03E-17 |

|                                                        |     |           |
|--------------------------------------------------------|-----|-----------|
| ECM-receptor interaction                               | 51  | -3.78E-14 |
| Complement and coagulation cascades                    | 47  | -4.12E-14 |
| Protein processing in endoplasmic reticulum            | 73  | -2.27E-10 |
| Pathways in cancer                                     | 118 | -4.80E-10 |
| Endocytosis                                            | 86  | -2.54E-09 |
| Hypertrophic cardiomyopathy (HCM)                      | 41  | -2.21E-08 |
| Dilated cardiomyopathy                                 | 43  | -2.32E-08 |
| Pancreatic cancer                                      | 35  | -1.62E-07 |
| Amoebiasis                                             | 49  | -4.92E-07 |
| Axon guidance                                          | 53  | -8.75E-07 |
| Small cell lung cancer                                 | 38  | -2.54E-06 |
| Protein digestion and absorption                       | 35  | -4.11E-06 |
| Regulation of actin cytoskeleton                       | 74  | -1.23E-05 |
| Sphingolipid metabolism                                | 21  | -3.10E-05 |
| N-Glycan biosynthesis                                  | 24  | -3.44E-05 |
| Mucin type O-Glycan biosynthesis                       | 16  | -4.86E-05 |
| Hepatitis C                                            | 50  | -5.09E-05 |
| Apoptosis                                              | 35  | -5.39E-05 |
| Chronic myeloid leukemia                               | 31  | -5.43E-05 |
| Chagas disease (American trypanosomiasis)              | 39  | -6.41E-05 |
| Staphylococcus aureus infection                        | 23  | -0.000115 |
| PPAR signaling pathway                                 | 32  | -0.000164 |
| Melanogenesis                                          | 37  | -0.000343 |
| Osteoclast differentiation                             | 42  | -0.000371 |
| Calcium signaling pathway                              | 58  | -0.000477 |
| Arrhythmogenic right ventricular cardiomyopathy (ARVC) | 29  | -0.000492 |
| Vascular smooth muscle contraction                     | 43  | -0.000493 |
| Toxoplasmosis                                          | 44  | -0.000532 |
| ErbB signaling pathway                                 | 32  | -0.000947 |
| Other glycan degradation                               | 10  | -0.000994 |
| TGF-beta signaling pathway                             | 31  | -0.00133  |
| Prostate cancer                                        | 32  | -0.00147  |
| Glycosphingolipid biosynthesis - ganglio series        | 9   | -0.00149  |
| ABC transporters                                       | 19  | -0.00161  |
| Glycosaminoglycan degradation                          | 11  | -0.002    |
| Tight junction                                         | 44  | -0.00219  |
| Salivary secretion                                     | 28  | -0.00234  |
| Insulin signaling pathway                              | 44  | -0.003    |
| Renin-angiotensin system                               | 10  | -0.00307  |
| Aldosterone-regulated sodium reabsorption              | 18  | -0.00322  |
| Adipocytokine signaling pathway                        | 25  | -0.00331  |
| Glioma                                                 | 24  | -0.00372  |
| Fc gamma R-mediated phagocytosis                       | 31  | -0.00372  |

|                                                            |    |          |
|------------------------------------------------------------|----|----------|
| Glycosaminoglycan biosynthesis - heparan sulfate / heparin | 12 | -0.00486 |
| Proximal tubule bicarbonate reclamation                    | 10 | -0.00495 |
| Type II diabetes mellitus                                  | 19 | -0.00508 |
| Carbohydrate digestion and absorption                      | 16 | -0.00518 |
| MAPK signaling pathway                                     | 76 | -0.00527 |

Table S3. ESC-OB GFP+ vs ESC significantly upregulated genes Signaling Pathway Analysis (Top 50 Terms)

| Signaling Pathway                                      | Gene Number | P value   |
|--------------------------------------------------------|-------------|-----------|
| Focal adhesion                                         | 124         | -4.02E-18 |
| ECM-receptor interaction                               | 67          | -4.52E-18 |
| Lysosome                                               | 79          | -1.93E-13 |
| Pathways in cancer                                     | 165         | -1.69E-12 |
| Dilated cardiomyopathy                                 | 57          | -8.72E-10 |
| Hypertrophic cardiomyopathy (HCM)                      | 54          | -1.03E-09 |
| Endocytosis                                            | 113         | -3.33E-09 |
| Axon guidance                                          | 74          | -1.05E-08 |
| Osteoclast differentiation                             | 66          | -1.10E-07 |
| Toxoplasmosis                                          | 69          | -2.60E-07 |
| MAPK signaling pathway                                 | 126         | -2.66E-07 |
| Rheumatoid arthritis                                   | 48          | -6.03E-07 |
| Cytokine-cytokine receptor interaction                 | 116         | -6.48E-07 |
| Vascular smooth muscle contraction                     | 66          | -8.63E-07 |
| Amoebiasis                                             | 62          | -2.20E-06 |
| Complement and coagulation cascades                    | 44          | -4.24E-06 |
| Protein processing in endoplasmic reticulum            | 83          | -4.40E-06 |
| Leukocyte transendothelial migration                   | 62          | -9.48E-06 |
| Protein digestion and absorption                       | 44          | -1.07E-05 |
| Regulation of actin cytoskeleton                       | 100         | -1.29E-05 |
| SNARE interactions in vesicular transport              | 24          | -1.30E-05 |
| Chagas disease (American trypanosomiasis)              | 53          | -1.64E-05 |
| Apoptosis                                              | 47          | -1.71E-05 |
| Malaria                                                | 29          | -2.00E-05 |
| Hepatitis C                                            | 68          | -2.05E-05 |
| TGF-beta signaling pathway                             | 46          | -2.93E-05 |
| Arrhythmogenic right ventricular cardiomyopathy (ARVC) | 41          | -3.80E-05 |

|                                        |     |           |
|----------------------------------------|-----|-----------|
| Small cell lung cancer                 | 46  | -4.33E-05 |
| Pancreatic cancer                      | 39  | -4.95E-05 |
| Salivary secretion                     | 42  | -5.05E-05 |
| Calcium signaling pathway              | 83  | -5.09E-05 |
| Drug metabolism - cytochrome P450      | 46  | -6.33E-05 |
| Metabolic pathways                     | 437 | -0.000123 |
| NOD-like receptor signaling pathway    | 32  | -0.000192 |
| Tight junction                         | 64  | -0.000201 |
| Toll-like receptor signaling pathway   | 50  | -0.00027  |
| PPAR signaling pathway                 | 41  | -0.000375 |
| Adipocytokine signaling pathway        | 36  | -0.000376 |
| Gastric acid secretion                 | 38  | -0.000407 |
| Melanogenesis                          | 49  | -0.000421 |
| Chemokine signaling pathway            | 82  | -0.000453 |
| Renal cell carcinoma                   | 37  | -0.00047  |
| Leishmaniasis                          | 34  | -0.000498 |
| N-Glycan biosynthesis                  | 28  | -0.000504 |
| Circadian rhythm                       | 15  | -0.000646 |
| Jak-STAT signaling pathway             | 69  | -7.00E-04 |
| Bacterial invasion of epithelial cells | 36  | -0.00108  |
| Sphingolipid metabolism                | 23  | -0.00153  |
| Cell adhesion molecules (CAMs)         | 66  | -0.0016   |
| Glycerophospholipid metabolism         | 39  | -0.00178  |

Table S4. qRT-PCR primer sequences

| Gene          | Forward primer (5'-3')   | Reverse primer (5'-3')  |
|---------------|--------------------------|-------------------------|
| <i>Gata4</i>  | TTCCTGCTCGGACTTGGGAC     | TTCCCAGGCAGGTGGAGAATAAG |
| <i>Gata6</i>  | CTCAGGGGTAGGGGCATCA      | GAGGACAGACTGACACCTATGTA |
| <i>Flk1</i>   | CCTGGTCAAACAGCTCATCA     | AAGCGTCTGCCTCAATCACT    |
| $\alpha$ -SMA | GTCCCAGACATCAGGGAGTAA    | TCGGATACTTCAGCGTCAGGA   |
| <i>Cxcl12</i> | CTTCCTCCCAGAAGTCAGTCATCC | ACACAACACTGAACCCATCGCTG |
| <i>Mash1</i>  | ACTTGAACCTATGGCGGGTT     | CCAGTTGGTAAAGTCCAGCAG   |

|               |                           |                              |
|---------------|---------------------------|------------------------------|
| <i>Cdx2</i>   | AGGCTGAGCCATGAGGAGTA      | CGAGGTCCATAATTCCACTCA        |
| <i>Col1a1</i> | CACCCTCAAGAGCCTGAGTC      | GTTCCGGGCTGATGTACCAGT        |
| <i>Col1a2</i> | TCGGGCCTGCTGGTGTTCGTG     | TGGGCGCGGCTGTATGAGTTCTTC     |
| <i>Twist1</i> | AGATGTCATTGTTTCCAGAGAAGGA | TTAGTTATCCAGCTCCAGAGTCTCTAGA |
| <i>Msx2</i>   | AACACAAGACCAACCGGAAG      | GCAGCCATTTTCAGCTTTTC         |
| <i>Runx2</i>  | AACCCACGGCCCTCCCTGAACTCT  | ACTGGCGGGGTGTAGGTAAAGGTG     |
| <i>Bglap</i>  | TCTCTCTGCTCACTCTGCTGGCC   | TTTGTCACTCAGGGCCGC           |
| <i>Ibsp</i>   | TACCGGCCACGCTACTTTCTTTAT  | GACCGCCAGCTCGTTTTTCATCC      |
