# Supplementary material
Source: PubMed Central journal article supplement (PMC6077105)
Supplement: NIHMS944442-supplement-2.pdf [file NIHMS944442-supplement-2.pdf]

Figure S1 qRT-PCR validation of osteoblast and bone related gene upregulation and Gene Ontology Analysis of significantly downregulated genes in ESC-OB versus ESC

A

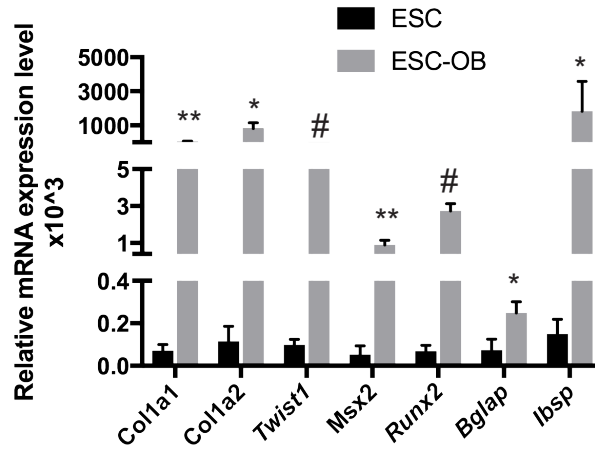

B

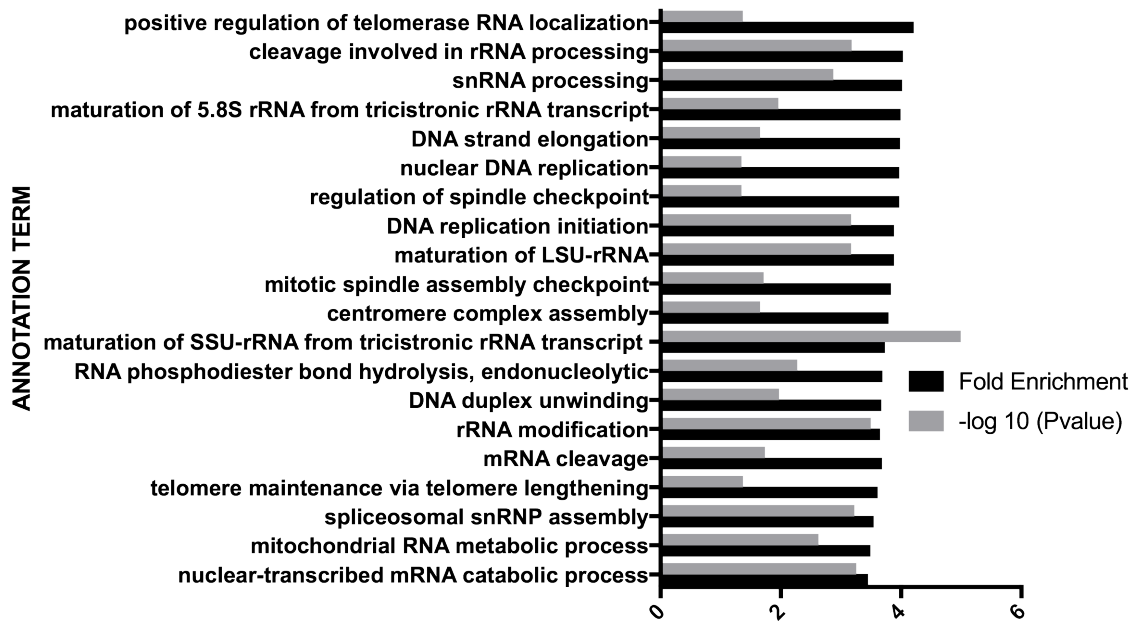

ESC-OB vs ESC significantly downregulated genes  
Gene Ontology Analysis (Top 20 Annotation Terms)

Figure S2 qRT-PCR validation of osteoblast and bone related gene upregulation and Gene Ontology Analysis of significantly downregulated genes in iPSC-OB versus iPSC

A

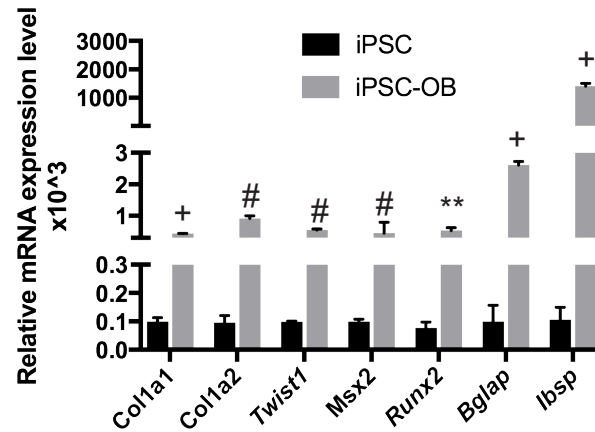

B

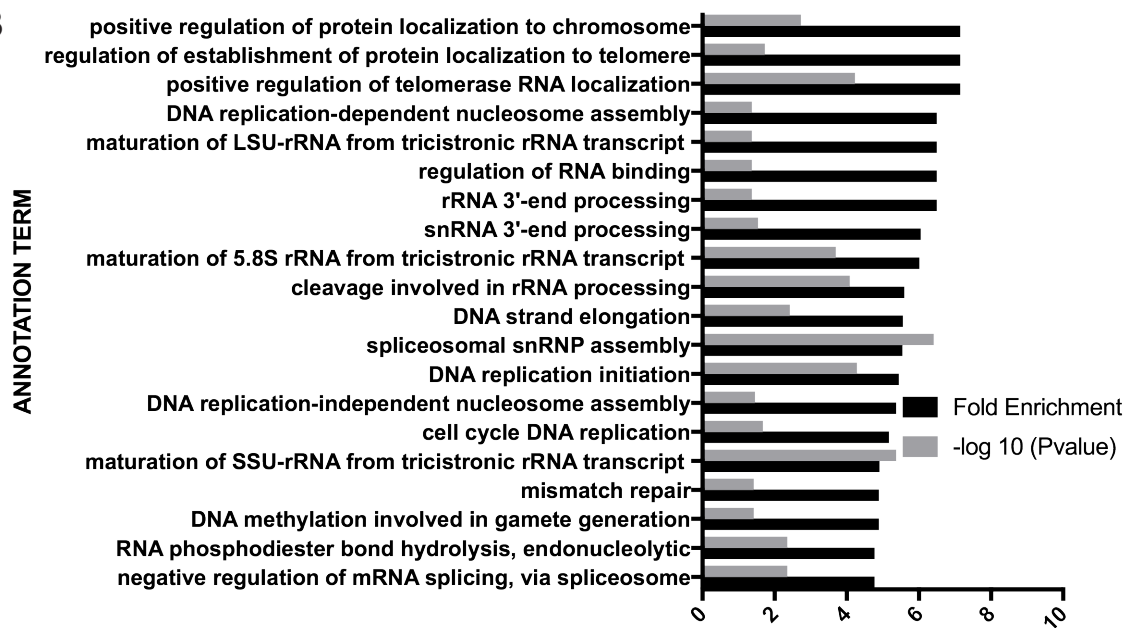

iPSC-OB vs iPSC significantly downregulated genes  
Gene Ontology Analysis (Top 20 Annotation Terms)

Figure S3 Gene Ontology Analysis of significantly downregulated genes in ESC-OB GFP+ versus ESC

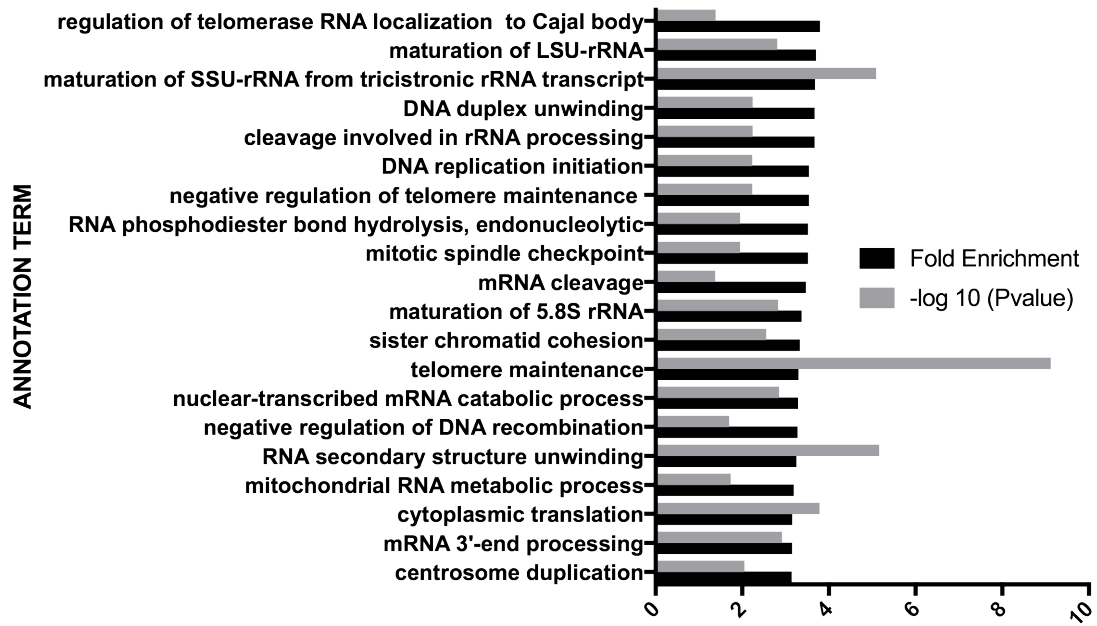

ESC-OB GFP + vs ESC significantly downregulated genes  
Gene Ontology Analysis (Top 20 Annotation Terms)
